# Supplementary material for: Epigenomics of being bullied: changes in DNA methylation following bullying exposure
Source: Epigenetics. 2020 Jan 28;15(6-7):750–64. doi: 10.1080/15592294.2020.1719303 (PMC7574379; doi:10.1080/15592294.2020.1719303)
Supplement: Supplemental Material [file KEPI_A_1719303_SM9840.xlsx]

## Sheet: S Table 4 Biological processes
GO Biological Processes
Gene Ontology (GO) analyses, p<0.001
GO pathway	Total genes in pathway (N)	Genes associated to meta-analysis (N)	%	P	Genes	GO pathway identified by GO analysis, p<0.01	GO pathway identified by GO analysis, p<0.0001
positive regulation of ryanodine-sensitive calcium-release channel activity	10	3	30	9.98954e-08	RYR2;GSTM2;CALM2	YES	YES
mitotic cell cycle arrest	10	3	30	2.30477e-07	DUSP1;NKX3-1;TP53
positive regulation of G2/M transition of mitotic cell cycle	10	3	30	2.32272e-07	PBX1;MTA3;SIN3A
lens morphogenesis in camera-type eye	26	5	19.2308	1.05945e-06	HIPK1;SKI;FOXE3;PRR3;PITX3	YES
negative regulation of astrocyte differentiation	12	3	25	4.90815e-06	HES5;NR2E1;NOG		YES
detection of calcium ion	14	3	21.4286	2.17121e-05	RYR2;CALM2;KCNIP1
regulation of cell aging	23	4	17.3913	2.23292e-05	CDK6;MARCH5;NUAK1;TP53
ganglioside metabolic process	15	3	20	2.5113e-05	ST8SIA4;ITGB8;B4GALNT1		YES
regulation of protein kinase C signaling	14	3	21.4286	2.9483e-05	CAPZB;VEGFA;AKAP12		YES
negative regulation of fibroblast proliferation	24	4	16.6667	3.82765e-05	SKI;LTA;MYC;TP53
cerebral cortex radially oriented cell migration	23	4	17.3913	4.22563e-05	NR2E1;MDGA1;LAMB1;LHX6		YES
cardiac muscle cell proliferation	14	3	21.4286	5.21651e-05	TGFB2;RXRB;ODZ4
deoxyribonucleoside triphosphate metabolic process	16	3	18.75	6.03055e-05	DTYMK;DGUOK;NUDT1	YES	YES
astrocyte differentiation	25	4	16	7.51288e-05	TAL1;HES5;CDK6;NFIX	YES	YES
spinal cord association neuron differentiation	15	3	20	7.57089e-05	TAL1;MDGA1;LHX5		YES
cell differentiation in hindbrain	24	4	16.6667	0.000150604	LHX5;CBLN1;NOG;NFIX	YES
negative regulation of protein binding	41	5	12.1951	0.000168453	DVL1;SENP2;NKX3-1;NOG;AES
positive regulation of intrinsic apoptotic signaling pathway	41	5	12.1951	0.000217207	PRKRA;NKX3-1;EI24;BAD;TP53
regulation of fibroblast growth factor receptor signaling pathway	27	4	14.8148	0.000323393	FGFBP3;DUSP6;NOG;PRKD2
neuron differentiation	885	48	5.42373	0.000430603	HIPK1;TAL1;CAPZB;DVL1;HES5;TGFB2;CXCR4;IHH;RAPH1;ROBO2;ST8SIA4;CLIC5;LAMA2;NR2E1;ANKS1A;DYNLT1;VEGFA;FYN;MDGA1;ABT1;WASL;LAMB1;C7orf51;EVX1;FZD1;COBL;PSD3;LHX6;PRKG1;PSD;CHAT;PITX3;ODZ4;B3GNT6;LHX5;PLXNC1;SOX5;FARP1;ATL1;CBLN1;MAPK8IP3;MYH10;NTN1;NOG;CACNA1G;AP2S1;NFIX;SNPH	YES
cellular response to alkaloid	30	4	13.3333	0.000437009	RYR2;GSTM2;EGR1;BAD	YES	YES
xenobiotic catabolic process	10	2	20	0.00044025	GSTM2;GSTM1		YES
glycolipid biosynthetic process	47	5	10.6383	0.000448504	DPM3;ST8SIA4;B4GALNT1;PIGQ;PLAUR		YES
regulation of insulin-like growth factor receptor signaling pathway	20	3	15	0.000487011	PHIP;IGFBP3;NKX3-1		YES
rRNA transcription	20	3	15	0.000552881	POLR1B;TP53;CD3EAP		YES
benzene-containing compound metabolic process	22	3	13.6364	0.000555739	GSTM2;GSTM1;AADAT		YES
intra-S DNA damage checkpoint	10	2	20	0.00057954	ATF2;MDC1		YES
N-glycan processing	10	2	20	0.00057954	ST8SIA4;MGAT4B		YES
positive regulation of DNA biosynthetic process	10	2	20	0.00062343	MYC;PRKD2
regulation of hematopoietic progenitor cell differentiation	33	4	12.1212	0.000635859	HES5;TESC;ZBTB1;L3MBTL	YES	YES
positive regulation of kidney development	10	2	20	0.000673832	MYC;NOG
protein deneddylation	11	2	18.1818	0.000724945	COPS7B;COPS5
cullin deneddylation	11	2	18.1818	0.000724945	COPS7B;COPS5
dermatan sulfate biosynthetic process	10	2	20	0.000774096	DSE;UST	YES
chaperone mediated protein folding requiring cofactor	11	2	18.1818	0.000827114	TOR3A;HLA-DMA
regulation of chromatin organization	96	8	8.33333	0.000927488	TAL1;IWS1;VEGFA;UBE2N;SIN3A;MYOCD;TP53;PRKD2
blood vessel remodeling	34	4	11.7647	0.000934882	TGFB2;EPAS1;VEGFA;HOXA3	YES	YES
maturation of SSU-rRNA	11	2	18.1818	0.000983875	BYSL;UTP20
negative regulation of bone resorption	11	2	18.1818	0.00100768	VEGFA;TNFRSF11B
regulation of cell proliferation involved in kidney development	10	2	20	0.001027	EGR1;MYC
positive regulation of T cell apoptotic process	11	2	18.1818	0.00108742	TGFB2;TP53
positive regulation of heart contraction	22	3	13.6364	0.00116881	RYR2;TGFB2;GSK3A	YES
positive regulation of Rap GTPase activity	11	2	18.1818	0.00117289	RAP1GAP;RASGRP3
retina development in camera-type eye	110	9	8.18182	0.0013063	HIPK1;SKI;CYP1B1;IHH;ACTL6A;TFAP2B;NR2E1;PRR3;MYH10		YES
surfactant homeostasis	11	2	18.1818	0.00134983	EPAS1;VEGFA
regulation of natural killer cell differentiation	12	2	16.6667	0.00136041	IL15RA;ZBTB1	YES
neural plate development	11	2	18.1818	0.00138801	DVL1;NOG
positive regulation of neuron death	48	5	10.4167	0.00146429	TGFB2;EGR1;TFAP2B;BAD;TP53
amelogenesis	11	2	18.1818	0.00147413	SLC24A4;KLK4
positive regulation of cell division	67	6	8.95522	0.00156769	TAL1;TGFB2;VEGFA;NKX3-1;IGF2;FAM59A
muscle fiber development	34	4	11.7647	0.00161987	SKI;CAPZB;VEGFA;MYOD1	YES	YES
vascular endothelial growth factor signaling pathway	11	2	18.1818	0.00162354	VEGFA;PRKD2
guanosine-containing compound metabolic process	128	9	7.03125	0.00175619	RAP1GAP;DGUOK;GNL1;NUDT1;RAB14;ATL3;ATL1;GMPR2;DNM2	YES	YES
neuromuscular process controlling balance	58	6	10.3448	0.00180324	CLIC5;EI24;ALDH1A3;A2BP1;NLGN2;MYH10	YES
response to oxygen levels	247	15	6.07287	0.00180592	RYR2;TGFB2;EPAS1;CXCR4;EGR1;LTA;VEGFA;CLDN3;NKX3-1;BAD;MYOD1;HSD11B2;MYOCD;ALDH3A1;TP53
regulation of mitochondrial membrane permeability	23	3	13.0435	0.00192853	ATF2;BAD;TP53		YES
myoblast differentiation	35	4	11.4286	0.00221759	EPAS1;DTYMK;MYOD1;MYOCD		YES
establishment of nucleus localization	11	2	18.1818	0.00233737	MYH10;NTN1
regulation of action potential	99	8	8.08081	0.00260359	SKI;HES5;CXCR4;KCNIP1;LAMA2;TSC1;ODZ4;PRX		YES
response to catecholamine	19	3	15.7895	0.00267593	RYR2;EGR1;RNLS		YES
response to monoamine	19	3	15.7895	0.00267593	RYR2;EGR1;RNLS		YES
response to testosterone	26	3	11.5385	0.00293023	DUSP1;NKX3-1;BAD
regulation of timing of cell differentiation	11	2	18.1818	0.00302396	NR2E1;SOX5
positive regulation of stem cell differentiation	12	2	16.6667	0.00342224	TGFB2;SOX5
platelet morphogenesis	12	2	16.6667	0.00346437	TAL1;NBEAL2		YES
platelet formation	12	2	16.6667	0.00346437	TAL1;NBEAL2		YES
cardiac left ventricle morphogenesis	12	2	16.6667	0.00380305	RYR2;GSK3A
middle ear morphogenesis	25	3	12	0.00389474	PRKRA;INSIG1;NOG	YES
protein sumoylation	27	3	11.1111	0.00435085	IFIH1;SENP2;UBE2I	YES
exocytosis	239	14	5.85774	0.00453405	SYT6;TGFB2;CALM2;CPLX1;EXOC1;EXOC3;NKD2;VEGFA;IGF2;MYH10;RPH3AL;MYO1F;SNPH;SYNJ1
positive regulation of oligodendrocyte differentiation	12	2	16.6667	0.00490633	CXCR4;ODZ4		YES
positive regulation of cell junction assembly	14	2	14.2857	0.00511026	VEGFA;TSC1
positive regulation of focal adhesion assembly	14	2	14.2857	0.00511026	VEGFA;TSC1
serine family amino acid catabolic process	15	2	13.3333	0.00533649	SARDH;C9orf6
negative regulation of osteoblast differentiation	33	4	12.1212	0.00548859	SKI;HDAC4;CDK6;NOG
head morphogenesis	35	4	11.4286	0.00579688	SKI;TGFB2;IHH;NOG
epithelial cell-cell adhesion	14	2	14.2857	0.00615887	CYP1B1;IHH
protein depolymerization	15	2	13.3333	0.00681435	KIF18A;SYNJ1	YES	YES
postsynaptic membrane organization	13	2	15.3846	0.00701575	DVL1;NLGN2
postreplication repair	15	2	13.3333	0.00827755	DTL;UBE2N
iron ion transport	47	4	8.51064	0.00937595	SFXN1;LMTK2;MCOLN1;DNM2
regulation of transforming growth factor beta production	16	2	12.5	0.00962597	TGFB2;ATF2		YES
endocytic recycling	15	2	13.3333	0.00975247	LMTK2;RAB14		YES
segment specification	16	2	12.5	0.0108068	HES5;COBL		YES
entry into host cell	16	2	12.5	0.0113202	CXCR4;DYNLT1
entry into host	16	2	12.5	0.0113202	CXCR4;DYNLT1
entry into cell of other organism involved in symbiotic interaction	16	2	12.5	0.0113202	CXCR4;DYNLT1
entry into other organism involved in symbiotic interaction	16	2	12.5	0.0113202	CXCR4;DYNLT1
movement in host environment	16	2	12.5	0.0113202	CXCR4;DYNLT1
movement in environment of other organism involved in symbiotic interaction	16	2	12.5	0.0113202	CXCR4;DYNLT1
regulation of centrosome duplication	17	2	11.7647	0.0124285	XPO1;TRIM37
macroautophagy	32	3	9.375	0.0134515	ATG4B;ATG16L1;SQSTM1

## Sheet: S Table 5 Molecular functions
GO Biological Processes
Gene Ontology (GO) analyses, p<0.001
GO pathway	Total genes in pathway (N)	Genes associated to meta-analysis (N)	%	P	Genes	GO pathway identified by GO analysis, p<0.01	GO pathway identified by GO analysis, p<0.0001
MAP kinase tyrosine/serine/threonine phosphatase activity	11	4	36.3636	1.1495e-11	DUSP7;DUSP1;DUSP6;DUSP16
core promoter binding	75	9	12	5.95563e-06	HDAC4;EGR1;TFAP2B;NKX3-1;MYOD1;MAZ;MYOCD;ZNF750;TP53		YES
RNA polymerase II core promoter proximal region sequence-specific DNA binding transcription factor activity involved in positive regulation of transcription	79	9	11.3924	8.83246e-06	PBX1;EPAS1;ATF2;EGR1;TFAP2B;NR2E1;MYOCD;ZNF750;TP53	YES	YES
sequence-specific DNA binding RNA polymerase II transcription factor activity	282	21	7.44681	1.30255e-05	NR5A2;PBX1;ESRRG;TAL1;FOXE3;HES5;EPAS1;ATF2;ZBTB20;EGR1;RXRB;TFAP2B;NR2E1;NKX3-1;MYOD1;MAZ;MYOCD;ZNF750;TP53;NFATC1;NFIX	YES	YES
histone acetyltransferase binding	17	3	17.6471	0.000262089	EPAS1;EGR1;TP53
ARF guanyl-nucleotide exchange factor activity	17	3	17.6471	0.000264318	IQSEC1;PSD3;PSD
RNA polymerase II distal enhancer sequence-specific DNA binding	17	3	17.6471	0.000312773	TAL1;ATF2;NFATC1		YES
aldehyde dehydrogenase (NAD) activity	10	2	20	0.00046684	ALDH1A3;ALDH3A1
oligopeptide binding	11	2	18.1818	0.000680003	GSTM2;GSTM1		YES
glutathione binding	11	2	18.1818	0.000680003	GSTM2;GSTM1		YES
RNA polymerase II core promoter sequence-specific DNA binding transcription factor activity	10	2	20	0.000798159	TFAP2B;NKX3-1		YES
protein kinase A binding	31	4	12.9032	0.00184059	RYR2;AKAP12;AKAP13;GSK3A	YES
voltage-gated chloride channel activity	12	2	16.6667	0.0023636	CLIC5;CLCN7
tau-protein kinase activity	12	2	16.6667	0.00302554	MARK1;GSK3A
intracellular ligand-gated calcium channel activity	12	2	16.6667	0.0034083	RYR2;MCOLN1
syntaxin-1 binding	13	2	15.3846	0.00466467	CPLX1;SNPH		YES
alkali metal ion binding	11	2	18.1818	0.00629562	HDAC4;PKM2		YES
NAD binding	45	4	8.88889	0.00764239	IDH1;CTBP2;ALDH1A3;HSD11B2
insulin-like growth factor receptor binding	14	2	14.2857	0.00822778	IGF2;SOCS2
identical protein binding	994	42	4.22535	0.0108284	HIPK1;RYR2;RAP1GAP;GABPB2;DVL1;SYT6;TGFB2;GSTM2;GSTM1;PRKRA;UGT1A8;LRRFIP1;PLEKHH2;IDH1;ATG16L1;USP4;ROBO2;AADAT;SQSTM1;SPATA24;TRIM39;TFAP2B;PRR3;DYNLT1;VEGFA;CLDN12;CLDN3;ODZ4;ATL3;AMICA1;TESC;MAP3K12;ATL1;ZBTB1;ALDH1A3;CBLN1;TP53;NOG;TRIM37;PPP1R13L;L3MBTL;PACSIN2
SH2 domain binding	31	3	9.67742	0.0139053	SQSTM1;AFAP1L2;MS4A2
acid-thiol ligase activity	18	2	11.1111	0.0164634	ACSF3;ACSM5

## Sheet: S Table 6 Cellular components
GO Biological Processes
Gene Ontology (GO) analyses, p<0.001
GO pathway	Total genes in pathway (N)	Genes associated to meta-analysis (N)	%	P	Genes	GO pathway identified by GO analysis, p<0.01	GO pathway identified by GO analysis, p<0.0001
integrator complex	12	3	25	2.31176e-06	INTS7;INTS8;INTS9
laminin complex	10	2	20	0.000680829	LAMA2;LAMB1
cell leading edge	289	19	6.57439	0.00123038	CAPZB;CXCR4;PLEKHH2;RAPH1;ROBO2;CDGAP;WASL;CDK6;FZD1;COBL;TSC1;PSD;KIF18A;TESC;SHISA9;MAPK8IP3;MYH10;TUBG1;PACSIN2	YES
aggresome	22	3	13.6364	0.00142526	SQSTM1;AFAP1L2;TRIM37
cortical actin cytoskeleton	34	4	11.7647	0.0014821	PLEKHH2;WASL;LANCL2;MYO1F	YES
nucleolar part	39	4	10.2564	0.00229171	POLR1B;POP7;UBE2I;CD3EAP		YES
ciliary basal body	39	4	10.2564	0.00266267	C1orf96;PTPN23;C11orf60;TUBG1
transcriptional repressor complex	66	7	10.6061	0.0034966	DDX20;SKI;HDAC4;MTA3;JAZF1;CTBP2;SIN3A
alpha-amino-3-hydroxy-5-methyl-4-isoxazolepropionic acid selective glutamate receptor complex	26	3	11.5385	0.00438785	NRN1;SHISA9;CACNG5	YES
exocyst	14	2	14.2857	0.00629132	EXOC1;EXOC3
synaptonemal complex	29	3	10.3448	0.00783441	MSH4;TEX12;UBE2I
oxidoreductase complex	75	5	6.66667	0.0144463	UQCRH;NDUFS6;NDUFA4;C9orf6;GMPR2	YES
